# Supplementary material for: Flavoured water consumption alters pharmacokinetic parameters and increases exposure of erlotinib and gefitinib in a preclinical study using Wistar rats
Source: PeerJ journal article supplement (doi:10.7717/peerj.9881), 2020-09-22
Supplement: PeerJ-supplementry_figure_2_051920.pdf [file PeerJ-supplementry_figure_2_051920.pdf]

a

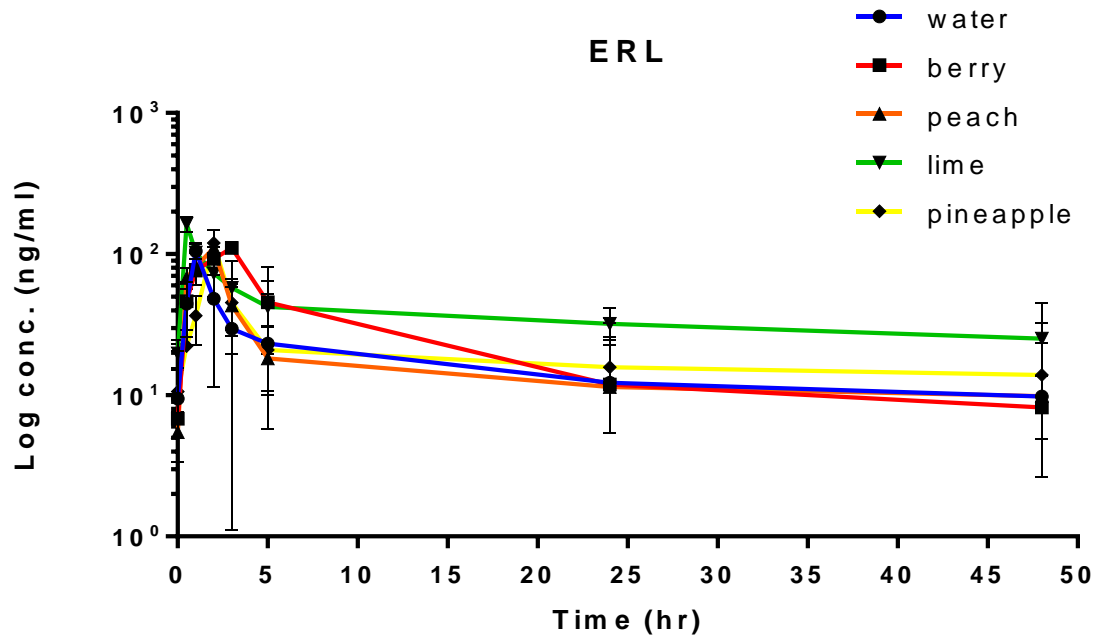

b

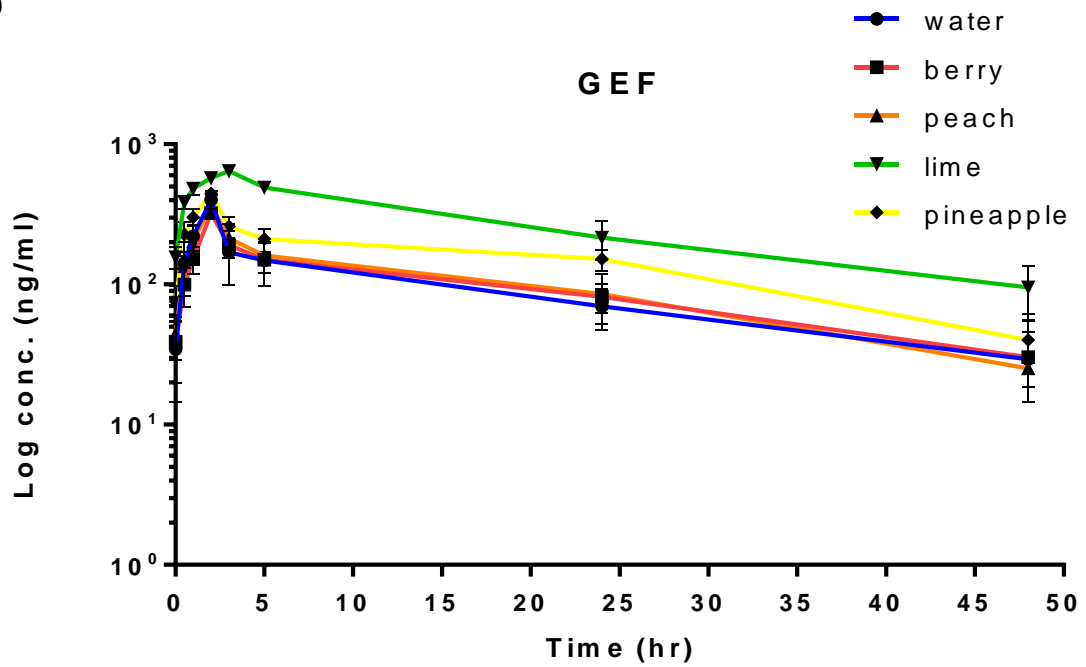

**Figure.S2** Log plasma concentration-time profile after an oral administration of 20 mg/kg of ERL (a), or GEF (b) in rats, along with different types of FW (n=5). Suitable dilutions of plasma samples were made before actual analysis.
