# Supplementary material for: Flavoured water consumption alters pharmacokinetic parameters and increases exposure of erlotinib and gefitinib in a preclinical study using Wistar rats
Source: PeerJ journal article supplement (doi:10.7717/peerj.9881), 2020-09-22
Supplement: PeerJ__supplemntry_figure_1_FW_051920.pdf [file PeerJ__supplemntry_figure_1_FW_051920.pdf]

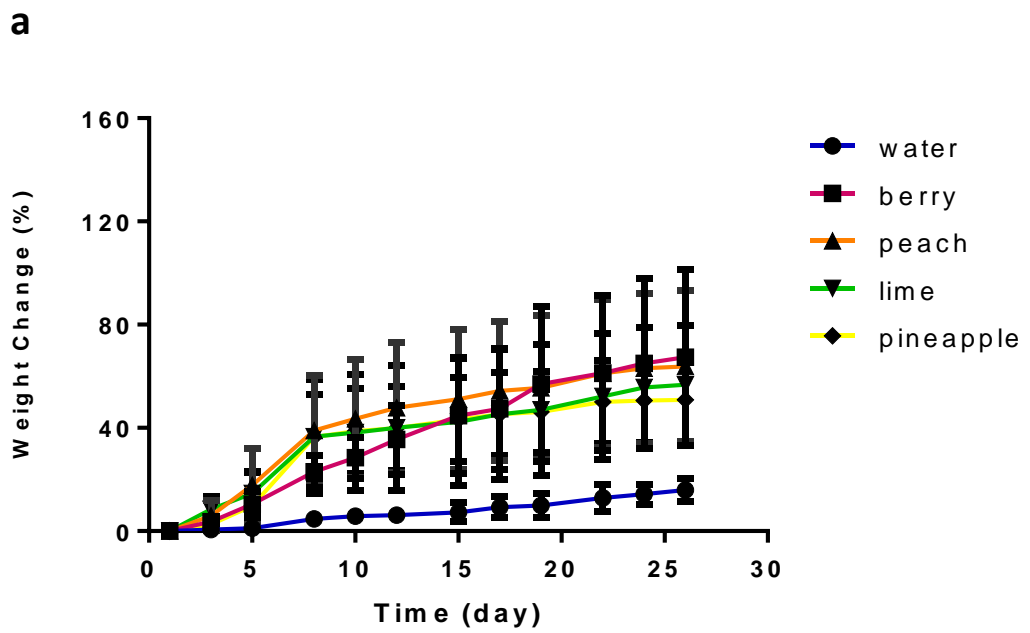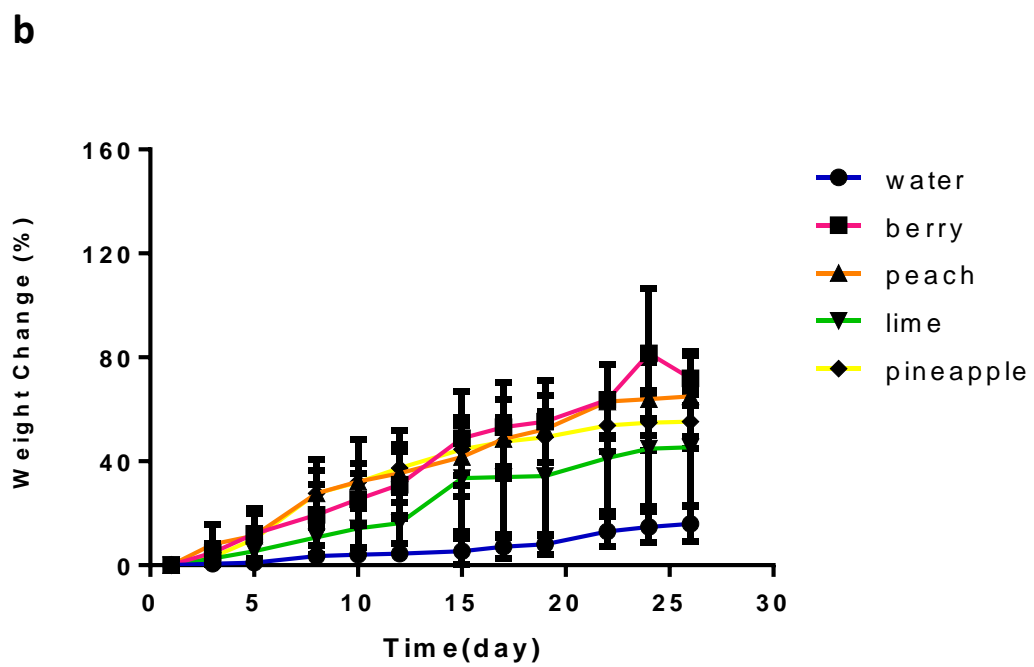

**Figure.S1** Average rat weight for ERL (a) and GEF (b) groups (n=5).
