# Supplementary material for: Flavoured water consumption alters pharmacokinetic parameters and increases exposure of erlotinib and gefitinib in a preclinical study using Wistar rats
Source: PeerJ. 2020 Sep 22;8:e9881. doi: 10.7717/peerj.9881 (PMC7518156; doi:10.7717/peerj.9881)
Supplement: Supplemental Information 8 [file peerj-08-9881-s008.xlsx]

## Sheet: Average ERL
Average ERL alone
TIME	Conc*10 (ng/mL plasma)	SD
0	9.47671	10.9906
0.5	44.5217	18.7019
1	105.1	36.9566
2	48.1636	36.6985
3	29.6588	28.5511
5	23.2476	28.6637
24	12.2744	19.9755
48	9.77268	13.7919
Average ERL+Berry
TIME	Conc*10 (ng/mL plasma)	SD
0	6.8284	8.85566
0.5	46.2866	17.3291
1	76.68	16.1477
2	92.3644	20.9999
3	110.409	37.2613
5	45.6497	35.5923
24	11.9467	12.5568
48	8.17548	5.55642
											Drug	Cmax (ng/mL)	tmax (h)	t½ (h)	AUC
Average ERL+Peach											Group II
TIME	Conc*10 (ng/mL plasma)	SD									ERL alone	105.1	1	29.42	1236.14
0	5.48922	2.11755									Group IV
0.5	67.804	11.5387									ERL+Berry	110.409	3	13.29	1331.37	5% FOR C MAX		7% FOR AREA
1	81.6506	20.9677									Group VI
2	110.91	10.3928									ERL+Peach	110.91	2	26.98	1210.61	6% FOR C MAX		-2% FOR AREA
3	43.2227	23.5869									Group VIII
5	18.2034	12.3942									ERL+ Lime	164.125	0.5	43.58	3338.36	56% FOR C MAX		170% FOR AREA
24	11.4226	23.9552									Group IX
48	9.85069	13.8112									ERL+Pineapple	119.64	2	35.56	1670.87	13% FOR C MAX		35% FOR AREA
Average ERL+ Lime
TIME	Conc*10 (ng/mL plasma)	SD
0	19.8312	4.72524
0.5	164.125	20.1434
1	102.78	17.8147
2	73.2756	23.5492
3	57.608	31.2582
5	42.1804	22.6365
24	32.1317	9.55685
48	25.1204	20.2172
Average ERL+Pineapple
TIME	Conc*10 (ng/mL plasma)	SD
0	10.6277	12.2951
0.5	22.2891	28.3509
1	36.6468	13.8732
2	119.64	28.2802
3	45.2677	16.2658
5	20.9397	10.2608
24	15.7632	10.3215
48	13.9521	18.4586

## Sheet: Average GEF
Average GEF alone
TIME	Conc*10 (ng/mL plasma)	SD
0	34.4911	20.0483
0.5	141.698	59.0848
1	220.042	46.3092
2	402.465	58.0784
3	169.309	70.7191
5	148.151	50.8695
24	69.7694	22.6794
48	29.2157	32.5144
Average GEF+Berry
TIME	Conc*10 (ng/mL plasma)	SD
0	39.1126	19.291
0.5	99.6999	30.2918
1	151.86	33.4639
2	322.389	30.8241
3	190.831	10.1702
5	149.678	9.06389
24	81.3801	19.1482
48	30.2157	15.6471
											Drug	Cmax (ng/mL)	tmax (h)	t½ (h)	AUC
Average GEF+Peach											Group I
TIME	Conc*10 (ng/mL plasma)	SD									GEF alone	402.465	2	17.95	5063.74
0	44.505	15.766									Group III
0.5	134.565	25.1973									GEF+Berry	322.389	2	17.73	5232.49	-19% FOR C MAX		3% FOR AREA
1	202.404	22.4237									Group V
2	365.434	69.9248									GEF+Peach	365.434	2	15.39	5298.58	-9% FOR C MAX		5% FOR AREA
3	213.12	59.0786									Group VII
5	160.682	40.971									GEF+Lime	642.568	3	16.94	15386.1	60% FOR C MAX		204% FOR AREA
24	85.2895	32.5462									Group X
48	25.2157	30.2255									GEF+Pineapple	445.134	2	17.79	8168.35	11% FOR C MAX		61% FOR AREA
Average GEF+ Lime
TIME	Conc*10 (ng/mL plasma)	SD
0	156.571	27.1255
0.5	386.526	43.1061
1	483.089	49.2851
2	574.37	20.5448
3	642.568	58.46
5	490.086	41.3466
24	215.703	67.241
48	95.2157	40.5489
Average GEF+Pineapple
TIME	Conc*10 (ng/mL plasma)	SD
0	jm	21.6388
0.5	226.506	55.2996
1	301.717	41.2024
2	445.134	24.8477
3	259.32	43.0497
5	210.414	40.7059
24	151.543	25.6651
48	40.2157	21.5248
