# Supplementary material for: Flavoured water consumption alters pharmacokinetic parameters and increases exposure of erlotinib and gefitinib in a preclinical study using Wistar rats
Source: PeerJ. 2020 Sep 22;8:e9881. doi: 10.7717/peerj.9881 (PMC7518156; doi:10.7717/peerj.9881)
Supplement: Supplemental Information 10 [file peerj-08-9881-s010.xlsx]

## Sheet: PK ERL
PKSolver 2.0		Sample Data for Usage of Pharmacokinetic Functions
Time Unit	h
Conc Unit	ng/ml		Analyst	Sadek
Dose	20		Date	2018-05-20
Dose Unit	mg/kg		Time	16:08:28
Time	Conc		Parameter	Value
0	9.47671		Cmax	#NAME?
0.5	44.5217		Tmax	#NAME?
1	105.1		Clast	#NAME?
2	48.1636		Tlast	#NAME?
3	29.6588		AUCt	#NAME?
5	23.2476		AUMCt	#NAME?
24	12.2744		MRTt	#NAME?
48	9.77268		Lz	#NAME?
			T1/2	#NAME?
Dose	20		AUCi	#NAME?
			AUMCi	#NAME?
Number of	4		MRTi	#NAME?
points for Lz			CL	#NAME?
			Vd	#NAME?
			Clast_pre	#NAME?
			AUCi_pre	#NAME?
			AUMCi_pre	#NAME?
			MRTi_pre	#NAME?
			CL_pre	#NAME?
			Vd_pre	#NAME?
							t1/2=0.693/kel

## Sheet: PK ERL+Berry
PKSolver 2.0		Sample Data for Usage of Pharmacokinetic Functions
Time Unit	h
Conc Unit	ng/ml		Analyst	Sadek
Dose	20		Date	2018-05-20
Dose Unit	mg/kg		Time	16:08:28
Time	Conc		Parameter	Value
0	6.8284		Cmax	#NAME?
0.5	46.2866		Tmax	#NAME?
1	76.68		Clast	#NAME?
2	92.3644		Tlast	#NAME?
3	110.409		AUCt	#NAME?
5	45.6497		AUMCt	#NAME?
24	11.9467		MRTt	#NAME?
48	8.17548		Lz	#NAME?
			T1/2	#NAME?
Dose	20		AUCi	#NAME?
			AUMCi	#NAME?
Number of	4		MRTi	#NAME?
points for Lz			CL	#NAME?
			Vd	#NAME?
			Clast_pre	#NAME?
			AUCi_pre	#NAME?
			AUMCi_pre	#NAME?
			MRTi_pre	#NAME?
			CL_pre	#NAME?
			Vd_pre	#NAME?
							t1/2=0.693/kel

## Sheet: PK ERL+Peach
PKSolver 2.0		Sample Data for Usage of Pharmacokinetic Functions
Time Unit	h
Conc Unit	ng/ml		Analyst	Sadek
Dose	20		Date	2018-05-20
Dose Unit	mg/kg		Time	16:08:28
Time	Conc		Parameter	Value
0	5.48922		Cmax	#NAME?
0.5	67.804		Tmax	#NAME?
1	81.6506		Clast	#NAME?
2	110.91		Tlast	#NAME?
3	43.2227		AUCt	#NAME?
5	18.2034		AUMCt	#NAME?
24	11.4226		MRTt	#NAME?
48	9.85069		Lz	#NAME?
			T1/2	#NAME?
Dose	20		AUCi	#NAME?
			AUMCi	#NAME?
Number of	4		MRTi	#NAME?
points for Lz			CL	#NAME?
			Vd	#NAME?
			Clast_pre	#NAME?
			AUCi_pre	#NAME?
			AUMCi_pre	#NAME?
			MRTi_pre	#NAME?
			CL_pre	#NAME?
			Vd_pre	#NAME?
							t1/2=0.693/kel

## Sheet: PK ERL+lime
PKSolver 2.0		Sample Data for Usage of Pharmacokinetic Functions
Time Unit	h
Conc Unit	ng/ml		Analyst	Sadek
Dose	20		Date	2018-05-20
Dose Unit	mg/kg		Time	16:08:28
Time	Conc		Parameter	Value
0	19.8312		Cmax	#NAME?
0.5	164.125		Tmax	#NAME?
1	102.78		Clast	#NAME?
2	73.2756		Tlast	#NAME?
3	57.608		AUCt	#NAME?
5	42.1804		AUMCt	#NAME?
24	32.1317		MRTt	#NAME?
48	25.1204		Lz	#NAME?
			T1/2	#NAME?
Dose	20		AUCi	#NAME?
			AUMCi	#NAME?
Number of	4		MRTi	#NAME?
points for Lz			CL	#NAME?
			Vd	#NAME?
			Clast_pre	#NAME?
			AUCi_pre	#NAME?
			AUMCi_pre	#NAME?
			MRTi_pre	#NAME?
			CL_pre	#NAME?
			Vd_pre	#NAME?
							t1/2=0.693/kel

## Sheet: PK ERL+Pineapple
PKSolver 2.0		Sample Data for Usage of Pharmacokinetic Functions
Time Unit	h
Conc Unit	ng/ml		Analyst	Sadek
Dose	20		Date	2018-05-20
Dose Unit	mg/kg		Time	16:08:28
Time	Conc		Parameter	Value
0	10.6277		Cmax	#NAME?
0.5	22.2891		Tmax	#NAME?
1	36.6468		Clast	#NAME?
2	119.64		Tlast	#NAME?
3	45.2677		AUCt	#NAME?
5	20.9397		AUMCt	#NAME?
24	15.7632		MRTt	#NAME?
48	13.9521		Lz	#NAME?
			T1/2	#NAME?
Dose	20		AUCi	#NAME?
			AUMCi	#NAME?
Number of	4		MRTi	#NAME?
points for Lz			CL	#NAME?
			Vd	#NAME?
			Clast_pre	#NAME?
			AUCi_pre	#NAME?
			AUMCi_pre	#NAME?
			MRTi_pre	#NAME?
			CL_pre	#NAME?
			Vd_pre	#NAME?
							t1/2=0.693/kel

## Sheet: PK GEF
PKSolver 2.0		Sample Data for Usage of Pharmacokinetic Functions
Time Unit	h
Conc Unit	ng/ml		Analyst	Sadek
Dose	20		Date	2018-05-20
Dose Unit	mg/kg		Time	16:08:28
Time	Conc		Parameter	Value
0	34.4911		Cmax	#NAME?
0.5	141.698		Tmax	#NAME?
1	220.042		Clast	#NAME?
2	402.465		Tlast	#NAME?
3	169.309		AUCt	#NAME?
5	148.151		AUMCt	#NAME?
24	69.7694		MRTt	#NAME?
48	29.2157		Lz	#NAME?
			T1/2	#NAME?
Dose	20		AUCi	#NAME?
			AUMCi	#NAME?
Number of	4		MRTi	#NAME?
points for Lz			CL	#NAME?
			Vd	#NAME?
			Clast_pre	#NAME?
			AUCi_pre	#NAME?
			AUMCi_pre	#NAME?
			MRTi_pre	#NAME?
			CL_pre	#NAME?
			Vd_pre	#NAME?
							t1/2=0.693/kel

## Sheet: PK GEF+Berry
PKSolver 2.0		Sample Data for Usage of Pharmacokinetic Functions
Time Unit	h
Conc Unit	ng/ml		Analyst	Sadek
Dose	20		Date	2018-05-20
Dose Unit	mg/kg		Time	16:08:28
Time	Conc		Parameter	Value
0	39.1126		Cmax	#NAME?
0.5	99.6999		Tmax	#NAME?
1	151.86		Clast	#NAME?
2	322.389		Tlast	#NAME?
3	190.831		AUCt	#NAME?
5	149.678		AUMCt	#NAME?
24	81.3801		MRTt	#NAME?
48	30.2157		Lz	#NAME?
			T1/2	#NAME?
Dose	20		AUCi	#NAME?
			AUMCi	#NAME?
Number of	4		MRTi	#NAME?
points for Lz			CL	#NAME?
			Vd	#NAME?
			Clast_pre	#NAME?
			AUCi_pre	#NAME?
			AUMCi_pre	#NAME?
			MRTi_pre	#NAME?
			CL_pre	#NAME?
			Vd_pre	#NAME?
							t1/2=0.693/kel

## Sheet: PK GEF+Peach
PKSolver 2.0		Sample Data for Usage of Pharmacokinetic Functions
Time Unit	h
Conc Unit	ng/ml		Analyst	Sadek
Dose	20		Date	2018-05-20
Dose Unit	mg/kg		Time	16:08:28
Time	Conc		Parameter	Value
0	44.505		Cmax	#NAME?
0.5	134.565		Tmax	#NAME?
1	202.404		Clast	#NAME?
2	365.434		Tlast	#NAME?
3	213.12		AUCt	#NAME?
5	160.682		AUMCt	#NAME?
24	85.2895		MRTt	#NAME?
48	25.2157		Lz	#NAME?
			T1/2	#NAME?
Dose	20		AUCi	#NAME?
			AUMCi	#NAME?
Number of	4		MRTi	#NAME?
points for Lz			CL	#NAME?
			Vd	#NAME?
			Clast_pre	#NAME?
			AUCi_pre	#NAME?
			AUMCi_pre	#NAME?
			MRTi_pre	#NAME?
			CL_pre	#NAME?
			Vd_pre	#NAME?
							t1/2=0.693/kel

## Sheet: PK GEF+Lime
PKSolver 2.0		Sample Data for Usage of Pharmacokinetic Functions
Time Unit	h
Conc Unit	ng/ml		Analyst	Sadek
Dose	20		Date	2018-05-20
Dose Unit	mg/kg		Time	16:08:28
Time	Conc		Parameter	Value
0	156.571		Cmax	#NAME?
0.5	386.526		Tmax	#NAME?
1	483.089		Clast	#NAME?
2	574.37		Tlast	#NAME?
3	642.568		AUCt	#NAME?
5	490.086		AUMCt	#NAME?
24	215.703		MRTt	#NAME?
48	95.2157		Lz	#NAME?
			T1/2	#NAME?
Dose	20		AUCi	#NAME?
			AUMCi	#NAME?
Number of	4		MRTi	#NAME?
points for Lz			CL	#NAME?
			Vd	#NAME?
			Clast_pre	#NAME?
			AUCi_pre	#NAME?
			AUMCi_pre	#NAME?
			MRTi_pre	#NAME?
			CL_pre	#NAME?
			Vd_pre	#NAME?
							t1/2=0.693/kel

## Sheet: PK GEF+Pineapple
PKSolver 2.0		Sample Data for Usage of Pharmacokinetic Functions
Time Unit	h
Conc Unit	ng/ml		Analyst	Sadek
Dose	20		Date	2018-05-20
Dose Unit	mg/kg		Time	16:08:28
Time	Conc		Parameter	Value
0	75.4648		Cmax	445.134
0.5	226.506		Tmax	2
1	301.717		Clast	#NAME?
2	445.134		Tlast	#NAME?
3	259.32		AUCt	#NAME?
5	210.414		AUMCt	#NAME?
24	151.543		MRTt	#NAME?
48	40.2157		Lz	#NAME?
			T1/2	#NAME?
Dose	20		AUCi	#NAME?
			AUMCi	#NAME?
Number of	4		MRTi	#NAME?
points for Lz			CL	#NAME?
			Vd	#NAME?
			Clast_pre	#NAME?
			AUCi_pre	#NAME?
			AUMCi_pre	#NAME?
			MRTi_pre	#NAME?
			CL_pre	#NAME?
			Vd_pre	#NAME?
							t1/2=0.693/kel
